# Supplementary material for: Transcriptome Profiling of Eutopic and Ectopic Endometrial Stromal Cells in Women with Endometriosis Based on High-Throughput Sequencing
Source: MDPI journal article supplement (doi:10.3390/biomedicines10102432), 2022-09-29
Supplement: s1 [file s1]

## Supplementary Materials:

**Table S1.** The clinical characteristics of the four patients with endometriosis.

| Case no. | Age, years | Stage | Sample Name | Type                  |
|----------|------------|-------|-------------|-----------------------|
| 1        | 44         | III   | EC_1B       | ectopic stromal cells |
|          |            |       | EU_1A       | eutopic stromal cells |
| 2        | 29         | III   | EC_4B       | ectopic stromal cells |
|          |            |       | EU_4A       | eutopic stromal cells |
| 3        | 31         | IV    | EC_19009    | ectopic stromal cells |
|          |            |       | EU_19008    | eutopic stromal cells |
| 4        | 45         | III   | EN19        | ectopic stromal cells |
|          |            |       | EN18        | eutopic stromal cells |

**Table S2.** Top 10 differentially expressed upregulated and downregulated mRNAs with the highest fold change.

| Gene symbol                                        | Gene name                                        | Log <sub>2</sub> fold change | FDR   |
|----------------------------------------------------|--------------------------------------------------|------------------------------|-------|
| Upregulated in ectopic endometrial stromal cells   |                                                  |                              |       |
| <i>SEC14L4</i>                                     | SEC14 like lipid binding 4                       | 10.9                         | 2E-04 |
| <i>SNAI3</i>                                       | snail family transcriptional repressor 3         | 10.3                         | 1E-03 |
| <i>CFAP99</i>                                      | cilia and flagella associated protein 99         | 10.1                         | 2E-02 |
| <i>CACNA1B</i>                                     | calcium voltage-gated channel subunit alpha1 B   | 8.6                          | 6E-04 |
| <i>VIPR1</i>                                       | vasoactive intestinal peptide receptor 1         | 6.8                          | 6E-05 |
| <i>DNER</i>                                        | delta/notch like EGF repeat containing           | 6.3                          | 8E-04 |
| <i>CABP1</i>                                       | calcium binding protein 1                        | 6.1                          | 3E-03 |
| <i>PAQR9</i>                                       | progesterone and adipoQ receptor family member 9 | 5.8                          | 8E-04 |
| <i>SLC22A3</i>                                     | solute carrier family 22 member 3                | 5.7                          | 2E-02 |
| <i>VSIG1</i>                                       | V-set and immunoglobulin domain containing 1     | 5.4                          | 1E-02 |
| Downregulated in ectopic endometrial stromal cells |                                                  |                              |       |
| <i>MYL3</i>                                        | myosin light chain 3                             | - 14.3                       | 4E-05 |
| <i>GLRA4</i>                                       | glycine receptor alpha 4                         | - 10.6                       | 3E-02 |
| <i>MAPK4</i>                                       | mitogen-activated protein kinase 4               | - 9.2                        | 1E-02 |
| <i>ADCYAP1R1</i>                                   | ADCYAP receptor type I                           | - 8.5                        | 3E-02 |
| <i>HOXD13</i>                                      | homeobox D13                                     | - 5.8                        | 1E-05 |
| <i>KIAA1456</i>                                    | KIAA1456                                         | - 4.3                        | 7E-05 |
| <i>FOXD2</i>                                       | forkhead box D2                                  | - 3.2                        | 2E-06 |
| <i>MYPN</i>                                        | myopalladin                                      | - 3.2                        | 1E-02 |
| <i>CGA</i>                                         | glycoprotein hormones, alpha polypeptide         | - 3.1                        | 2E-02 |
| <i>RNF182</i>                                      | ring finger protein 182                          | - 3.1                        | 1E-02 |

**Table S3.** KEGG analysis showed that the DEGs were mostly involved in three pathways: the PI3K-Akt signaling pathway, cytokine-cytokine receptor interaction, and MAPK signaling pathway.

| Category                               | n  | Involved DEGs                                                                                                                                                                                                                                               |
|----------------------------------------|----|-------------------------------------------------------------------------------------------------------------------------------------------------------------------------------------------------------------------------------------------------------------|
| PI3K-Akt signaling pathway             | 39 | IGF1, TNC, LAMC2, NGFR, FGF22, PPP2R2C, COL4A4, ITGA6, FLT1, ITGB8, MET, CSF3, AREG, VEGFA, GHR, CCND2, PGF, KDR, ITGA7, IL6, TLR2, FGF7, COL6A1, COL6A2, CREB5, FGF18, IL6R, ITGA5, PRKAA2, TGFA, NOS3, DDIT4, GNG4, IL7R, COL4A3, INSR, NTF3, GNG2, LPAR1 |
| Cytokine-cytokine receptor interaction | 36 | IL32, TNFRSF1B, NGFR, CXCL2, TGFB2, TGFBR1, CSF3, PF4V1, GHR, IL1A, CCL20, CXCR4, INHBA, CXCL6, IL1B, GDF5, LIF, IL6, IL1RN, IL33, TSLP, TNFRSF21, CCL28, GDF6, EDA, IL6R, CCR5, IL24, CXCL3, CXCL5, CXCL1, IL15, CSF2, IL7R, CXCL8, IFNE                   |
| MAPK signaling pathway                 | 32 | MAP3K14, CACNA1G, IGF1, RASGRF1, NGFR, FGF22, CACNG4, TGFB2, FLT1, CACNG7, MET, TGFBR1, MAPK8, MAP2K6, AREG, PTPN5, VEGFA, RASGRF2, IL1A, STMN1, PGF, DUSP4, IL1B, KDR, NFATC1, FGF7, FGF18, TGFA, CD14, INSR, NTF3, PLA2G4E                                |

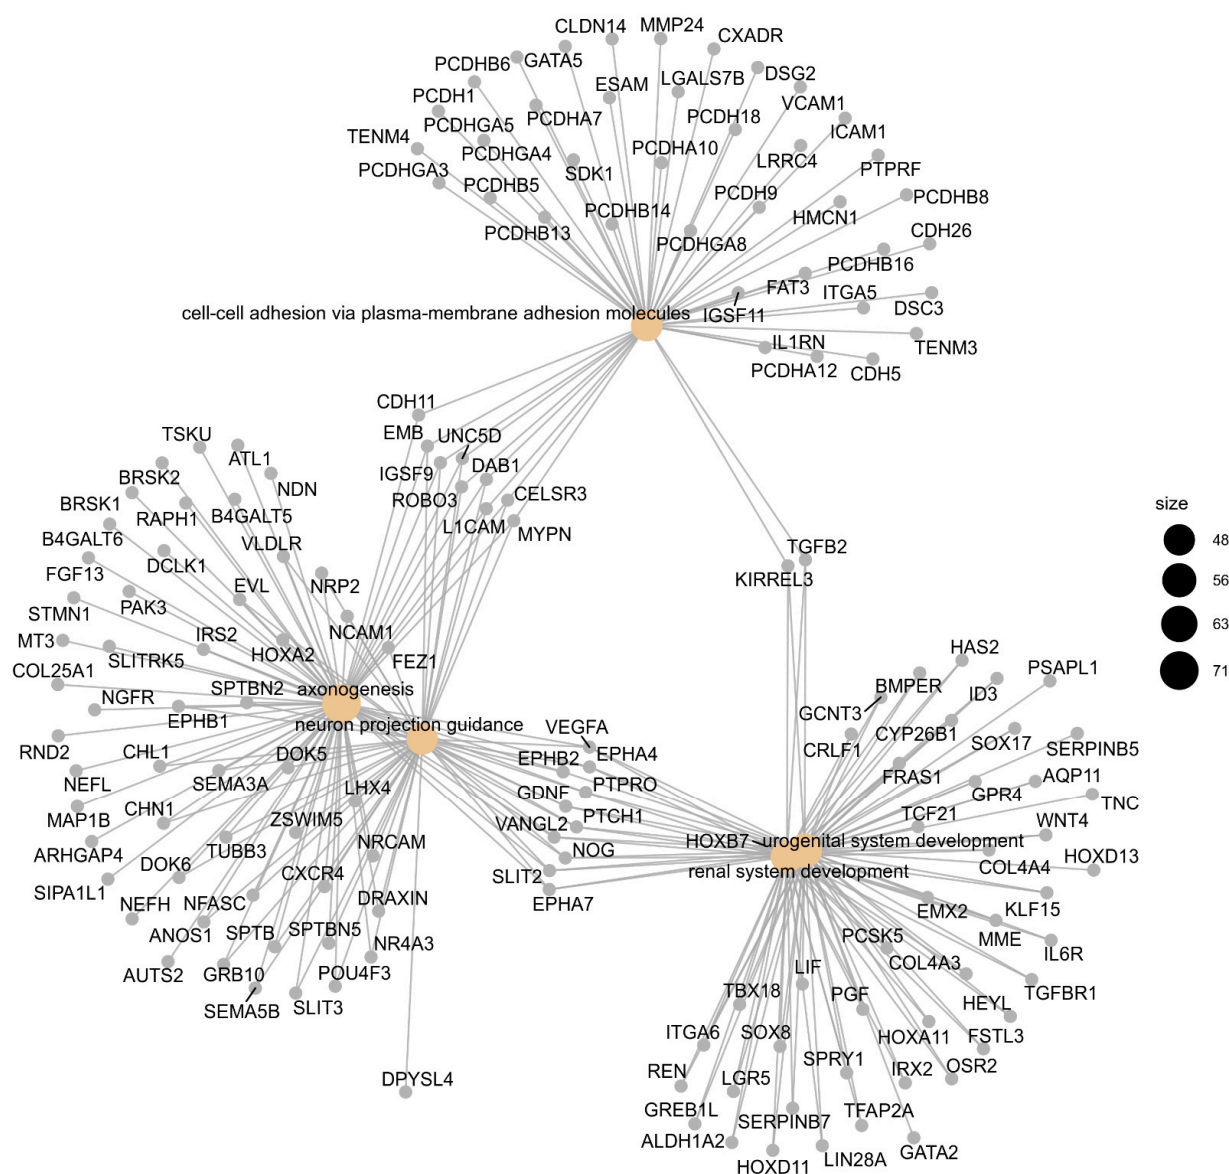

**Figure S1.** The genes associated with the five GO biological processes terms are illustrated by the cnetplot.

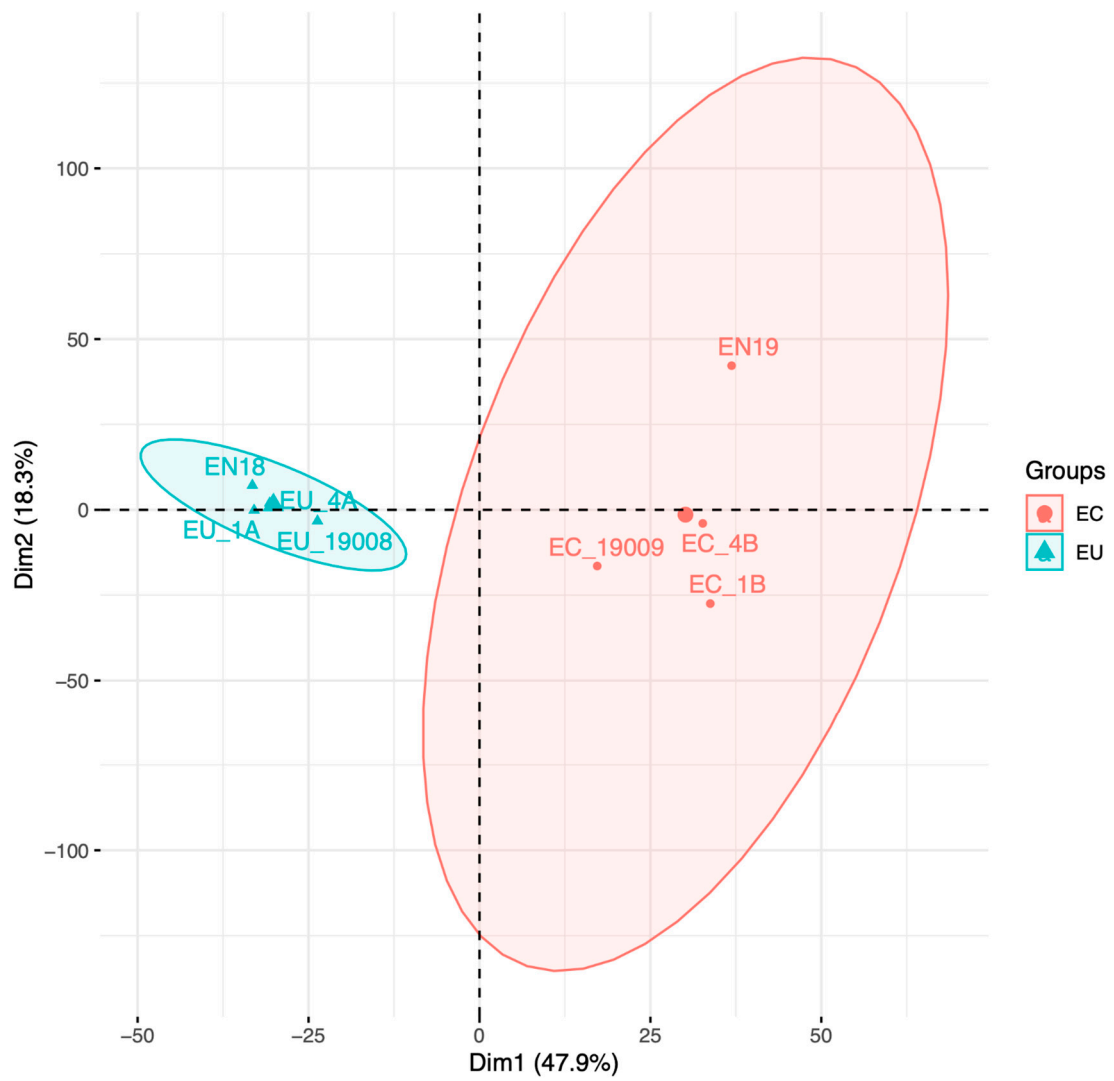

**Figure S2.** PCA plot of RNA-seq data show the characteristics of samples according to gene expression (FPKM) levels. Each dot indicates a sample.
